# Supplementary material for: Prognostic impact of cooccurring mutations in FLT3-ITD pediatric acute myeloid leukemia
Source: PubMed Central journal article supplement — Blood Adv. 2024 Feb 2;8(9):2094–103. doi: 10.1182/bloodadvances.2023011980 (PMC11063409; doi:10.1182/bloodadvances.2023011980), 2024-02-02

**Supplemental Figure S1.** UpSet plot of types of cytomolecular analyses utilized in characterizing the genomic landscape of FLT3-ITD positive cohort. Clinical mutations: single gene analysis used for clinical allocation in trials or performed retrospectively (*FLT3-ITD*, *NPM1*, *CEBPA*, *WT1*, *NUP98-NSD1*, *UBTF*), Karyotype: full karyotype, RNAseq: RNA sequencing, TCS: targeted capture sequencing, WGS: whole genome sequencing.

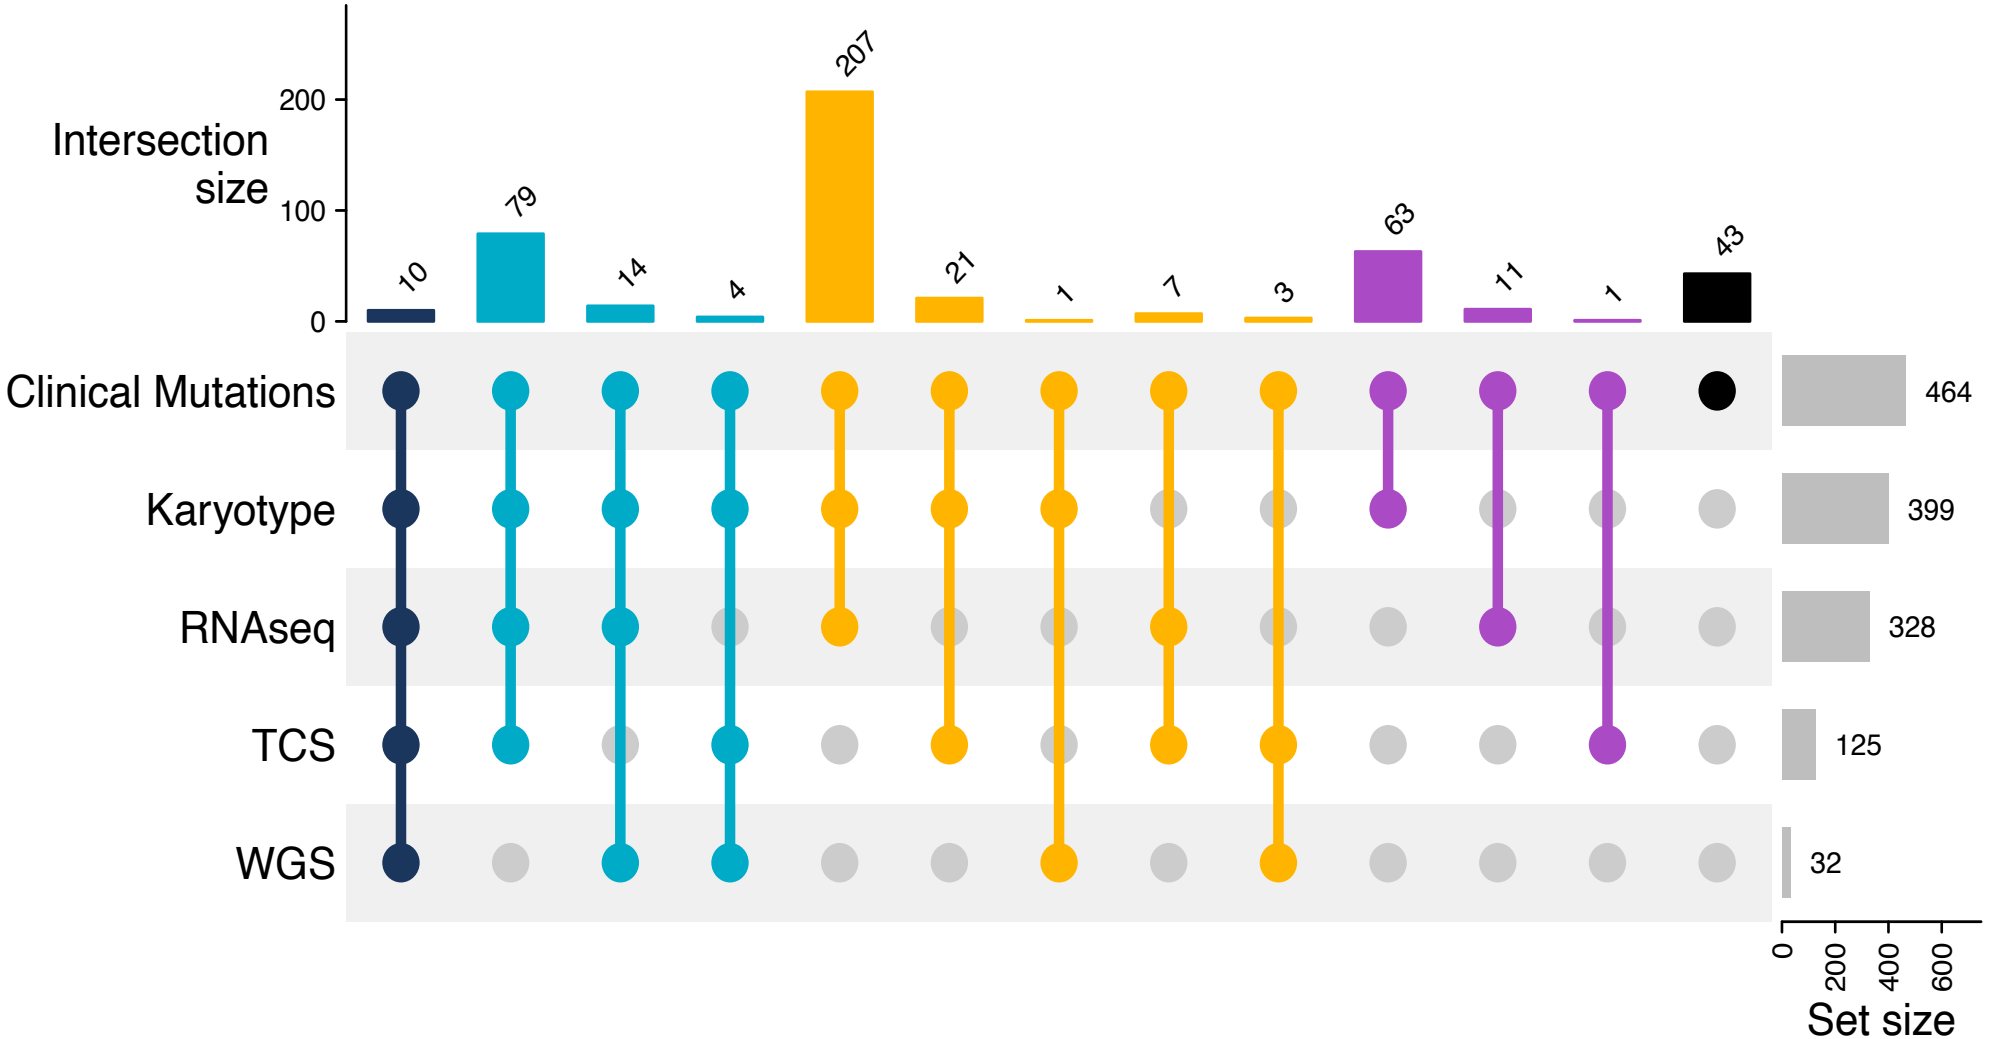

**Supplemental Figure S2. Outcomes of ITD<sup>POS</sup> vs non-ITD patients. (A) 5-year event-free survival, (B) overall survival, (C) relapse risk**

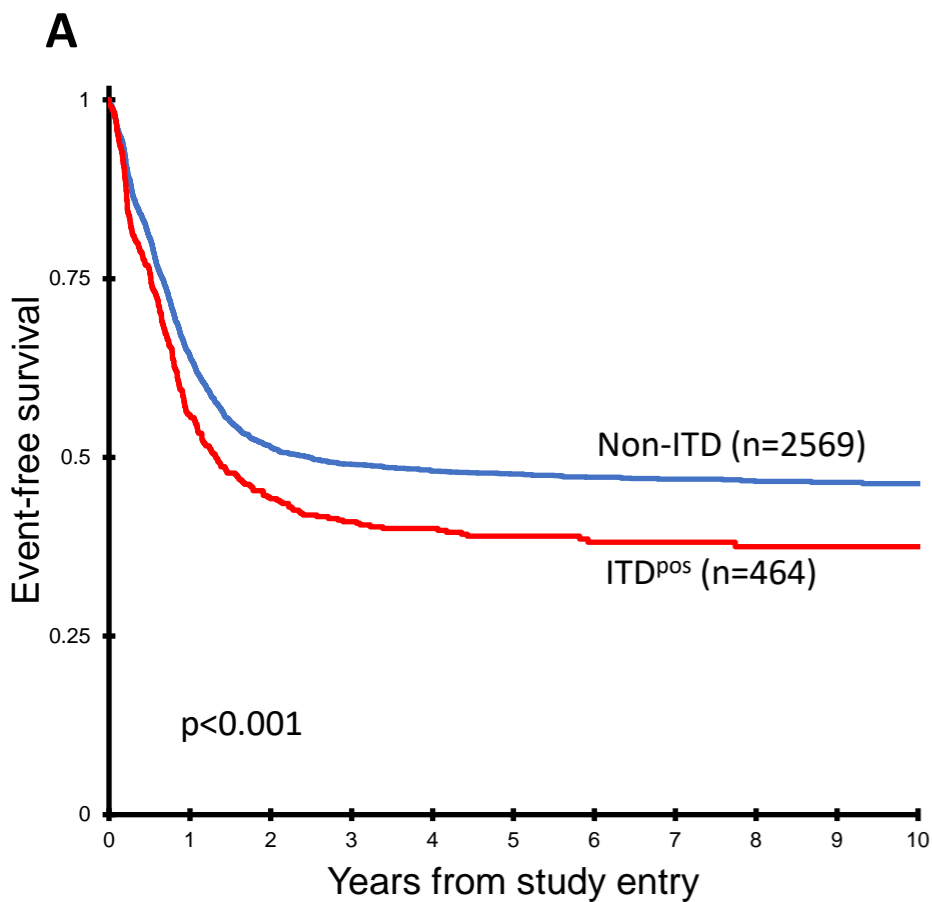

| No. at risk      |      |      |      |      |      |     |     |     |     |     |     |
|------------------|------|------|------|------|------|-----|-----|-----|-----|-----|-----|
| Year             | 0    | 1    | 2    | 3    | 4    | 5   | 6   | 7   | 8   | 9   | 10  |
| Non-ITD          | 2569 | 1616 | 1263 | 1157 | 1088 | 960 | 768 | 591 | 426 | 297 | 226 |
| <i>FLT3</i> -ITD | 464  | 257  | 196  | 175  | 153  | 123 | 90  | 71  | 54  | 35  | 24  |

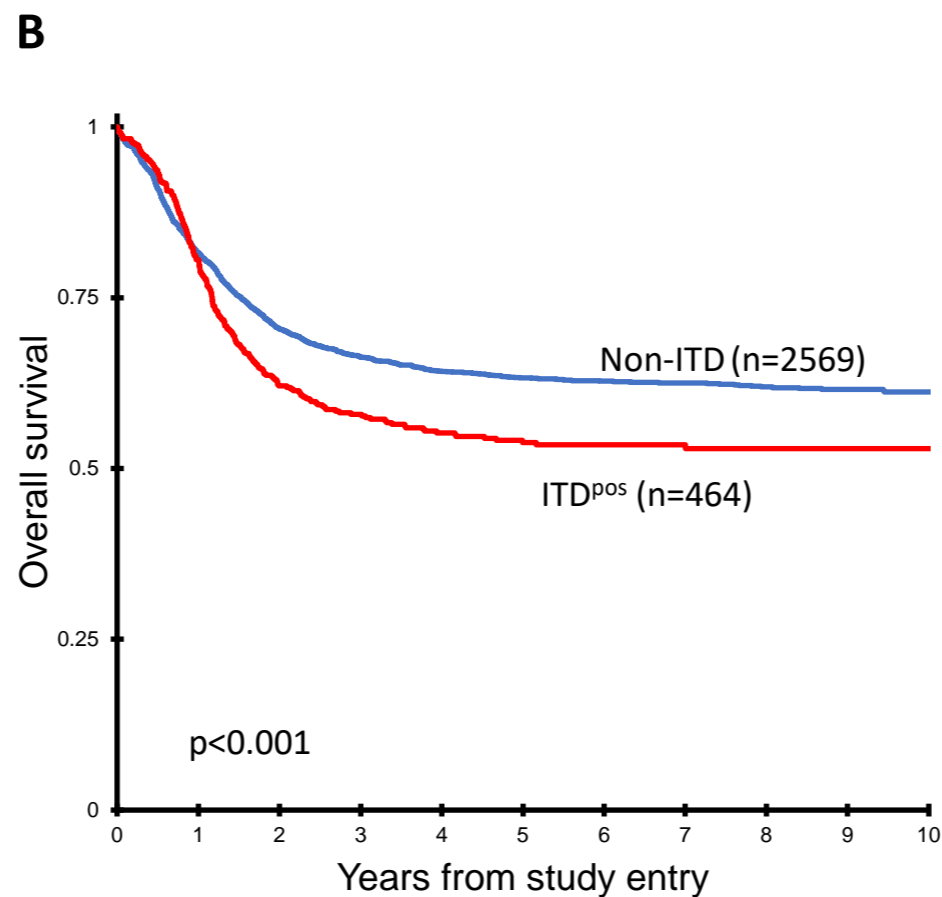

| No. at risk      |      |      |      |      |      |      |      |     |     |     |     |
|------------------|------|------|------|------|------|------|------|-----|-----|-----|-----|
| Year             | 0    | 1    | 2    | 3    | 4    | 5    | 6    | 7   | 8   | 9   | 10  |
| Non-ITD          | 2569 | 2045 | 1720 | 1558 | 1455 | 1282 | 1025 | 790 | 566 | 383 | 288 |
| <i>FLT3</i> -ITD | 464  | 367  | 273  | 245  | 212  | 169  | 125  | 99  | 78  | 51  | 35  |

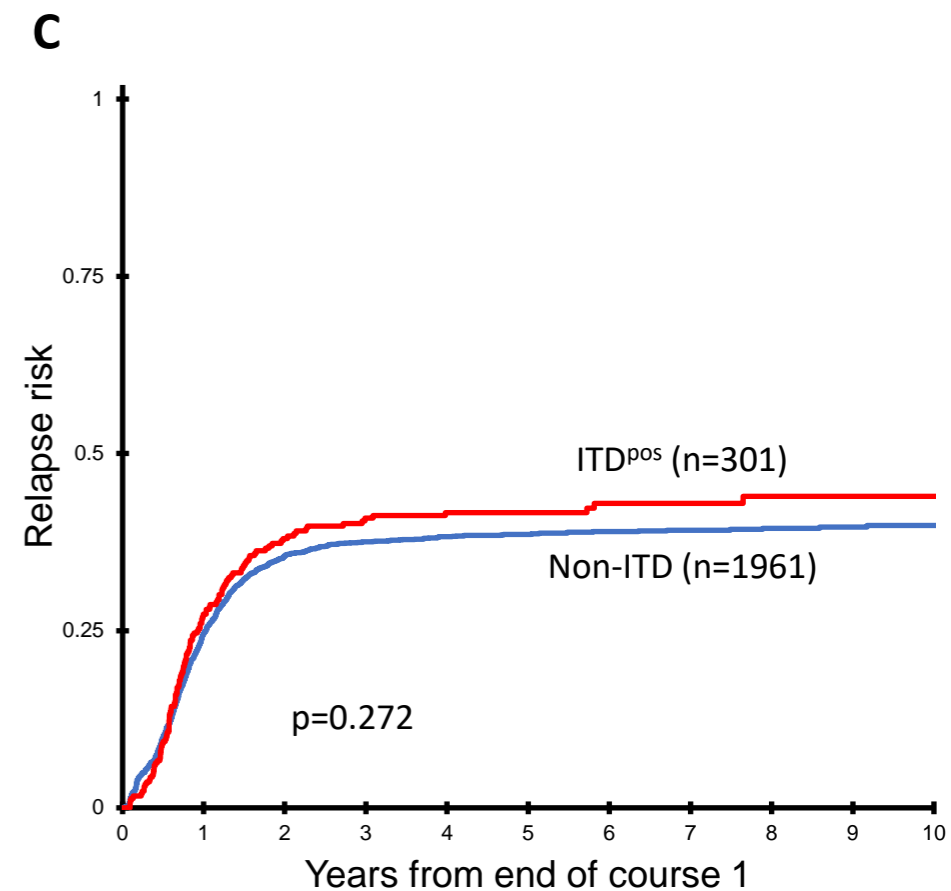

| No. at risk      |      |      |      |     |     |     |     |     |     |     |     |
|------------------|------|------|------|-----|-----|-----|-----|-----|-----|-----|-----|
| Year             | 0    | 1    | 2    | 3   | 4   | 5   | 6   | 7   | 8   | 9   | 10  |
| Non-ITD          | 1961 | 1323 | 1074 | 992 | 932 | 814 | 648 | 498 | 346 | 238 | 176 |
| <i>FLT3</i> -ITD | 301  | 197  | 155  | 140 | 123 | 99  | 71  | 58  | 43  | 29  | 20  |

**Supplemental Figure S3. Event-free survival of ITD<sup>pos</sup> patients compared to non-ITD patients according to treatment trial. (A) CCG-2961, (B) AAML03P1, (C) AAML0531, (D) AAML1031.**

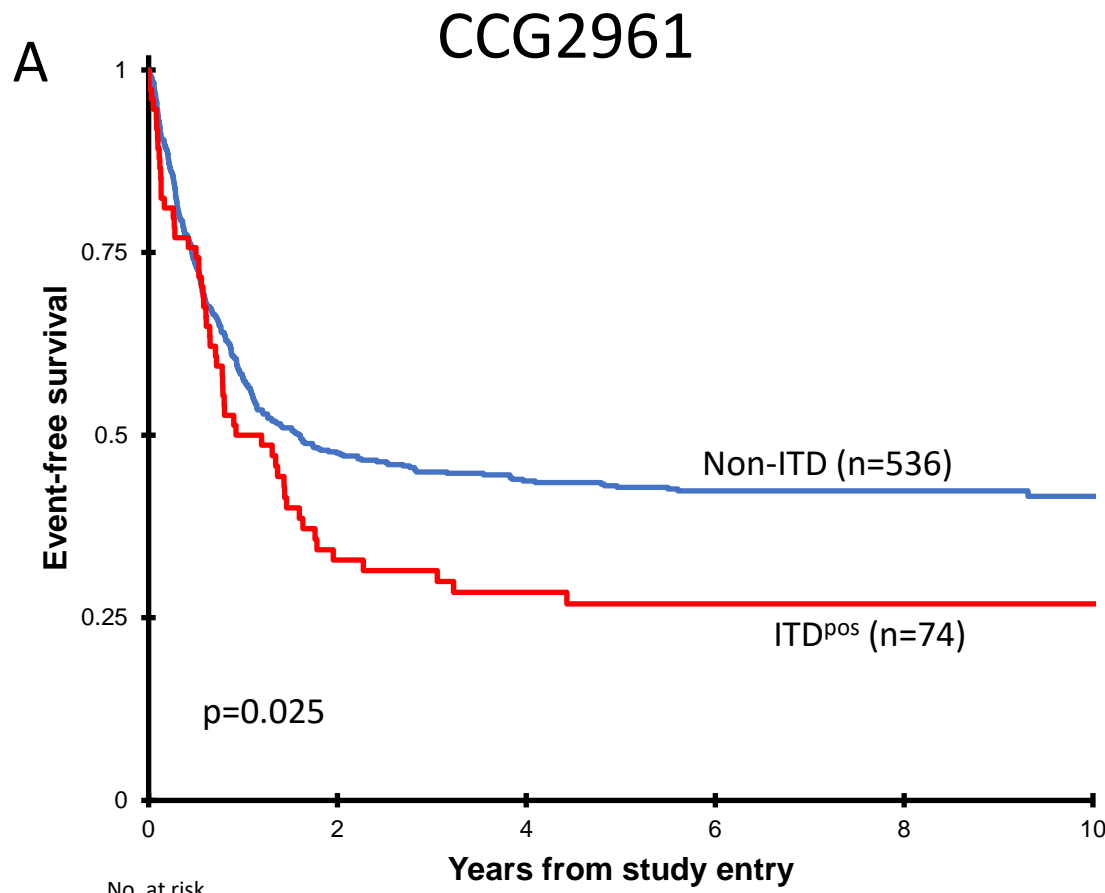

| No. at risk        |     |     |     |     |     |     |     |     |    |    |    |
|--------------------|-----|-----|-----|-----|-----|-----|-----|-----|----|----|----|
| Year               | 0   | 1   | 2   | 3   | 4   | 5   | 6   | 7   | 8  | 9  | 10 |
| Non-ITD            | 536 | 306 | 246 | 223 | 210 | 192 | 167 | 122 | 84 | 61 | 38 |
| ITD <sup>pos</sup> | 74  | 37  | 23  | 21  | 18  | 15  | 11  | 11  | 10 | 6  | 5  |

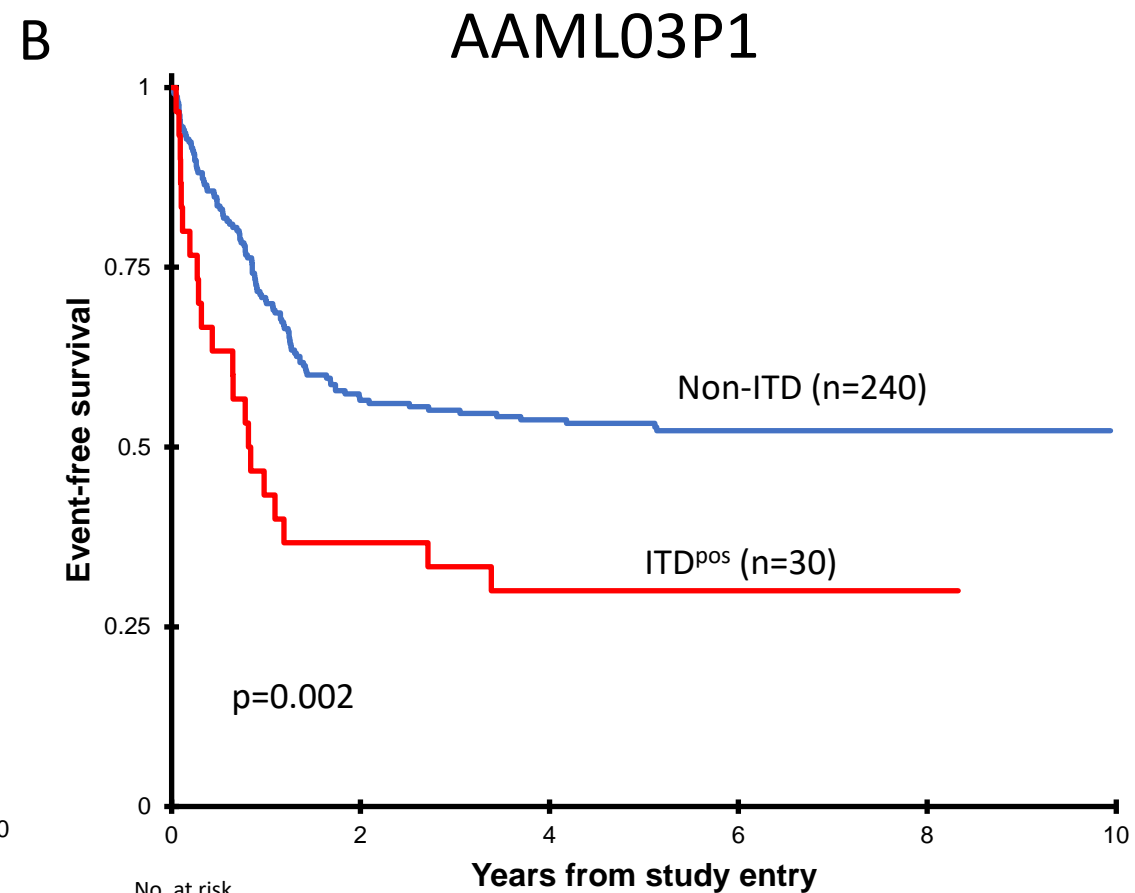

| No. at risk        |     |     |     |     |     |     |    |    |    |   |    |
|--------------------|-----|-----|-----|-----|-----|-----|----|----|----|---|----|
| Year               | 0   | 1   | 2   | 3   | 4   | 5   | 6  | 7  | 8  | 9 | 10 |
| Non-ITD            | 240 | 164 | 128 | 120 | 117 | 103 | 86 | 80 | 53 | 8 | 0  |
| ITD <sup>pos</sup> | 30  | 13  | 11  | 10  | 8   | 6   | 5  | 5  | 1  | 0 | 0  |

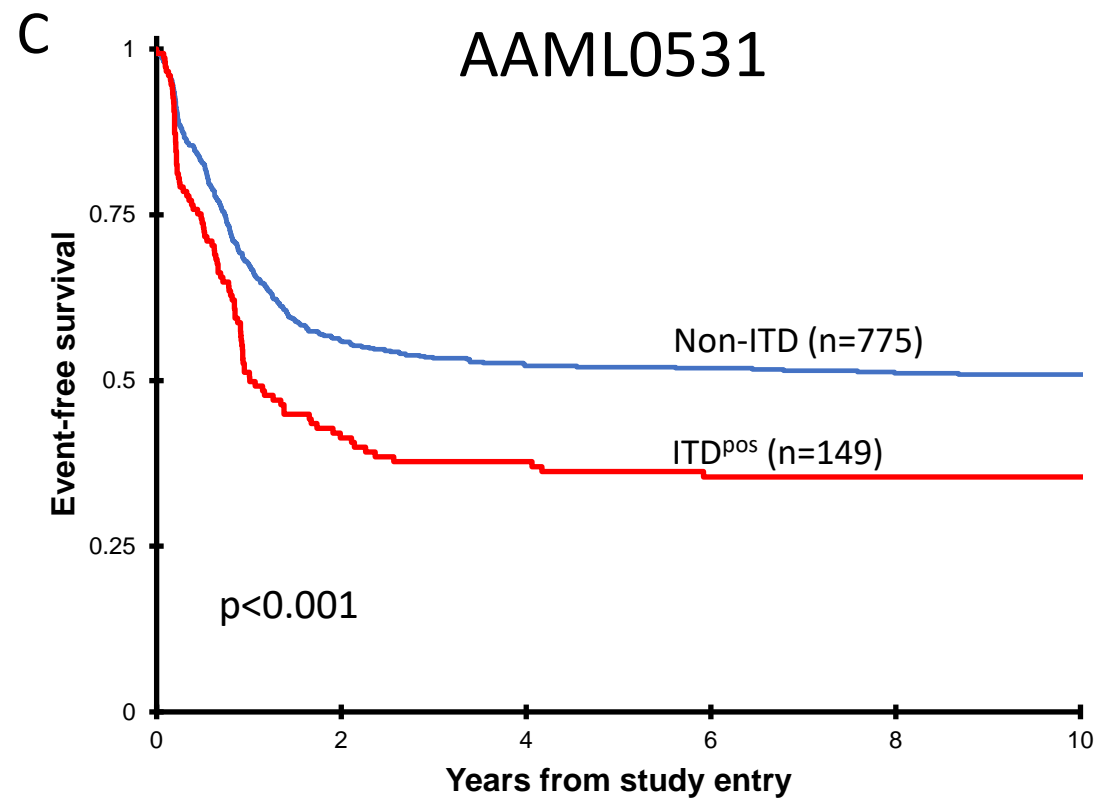

| No. at risk        |     |     |     |     |     |     |     |     |     |     |     |
|--------------------|-----|-----|-----|-----|-----|-----|-----|-----|-----|-----|-----|
| Year               | 0   | 1   | 2   | 3   | 4   | 5   | 6   | 7   | 8   | 9   | 10  |
| Non-ITD            | 775 | 510 | 419 | 382 | 351 | 332 | 303 | 271 | 249 | 224 | 188 |
| ITD <sup>pos</sup> | 149 | 75  | 58  | 52  | 50  | 48  | 45  | 39  | 35  | 29  | 19  |

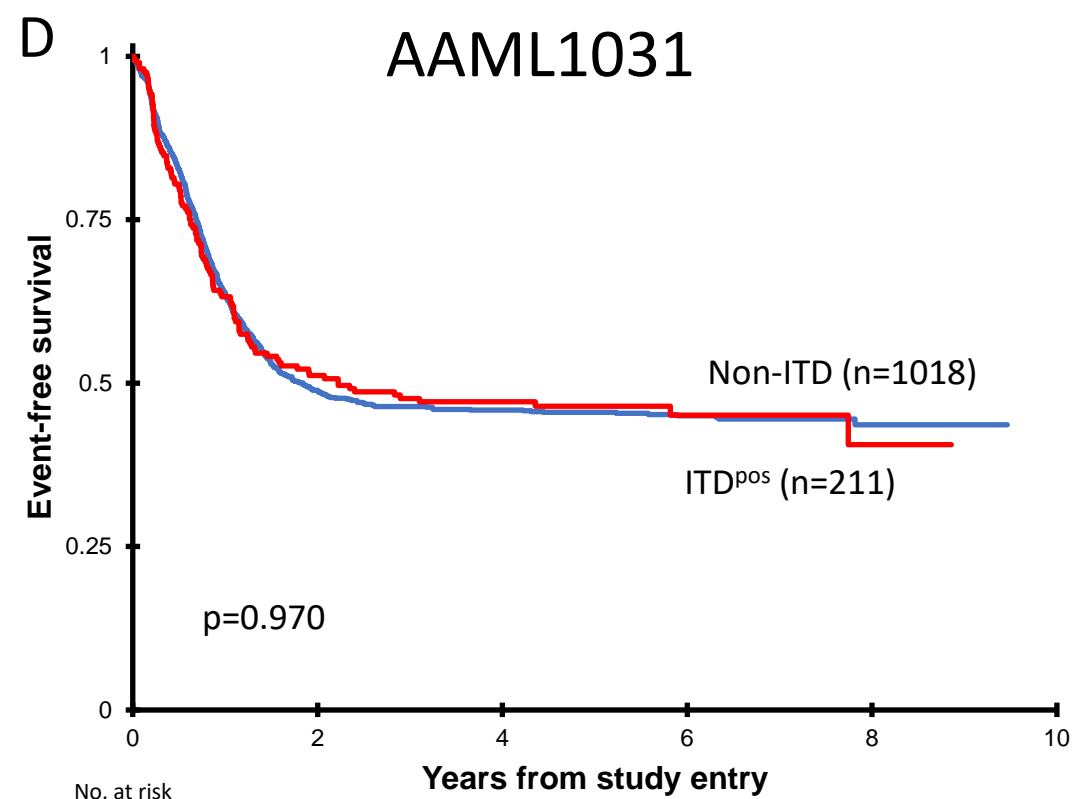

| No. at risk        |      |     |     |     |     |     |     |     |    |   |    |
|--------------------|------|-----|-----|-----|-----|-----|-----|-----|----|---|----|
| Year               | 0    | 1   | 2   | 3   | 4   | 5   | 6   | 7   | 8  | 9 | 10 |
| Non-ITD            | 1018 | 636 | 470 | 432 | 410 | 333 | 212 | 118 | 40 | 4 | 0  |
| ITD <sup>pos</sup> | 211  | 132 | 104 | 92  | 77  | 54  | 29  | 16  | 8  | 0 | 0  |

**Supplemental Figure S4. Outcomes of ITD<sup>POS</sup> patients stratified by presence of co-occurring mutations. (A) 5-year event-free survival, (B) 5-year overall survival, (C) 5-year relapse risk.**

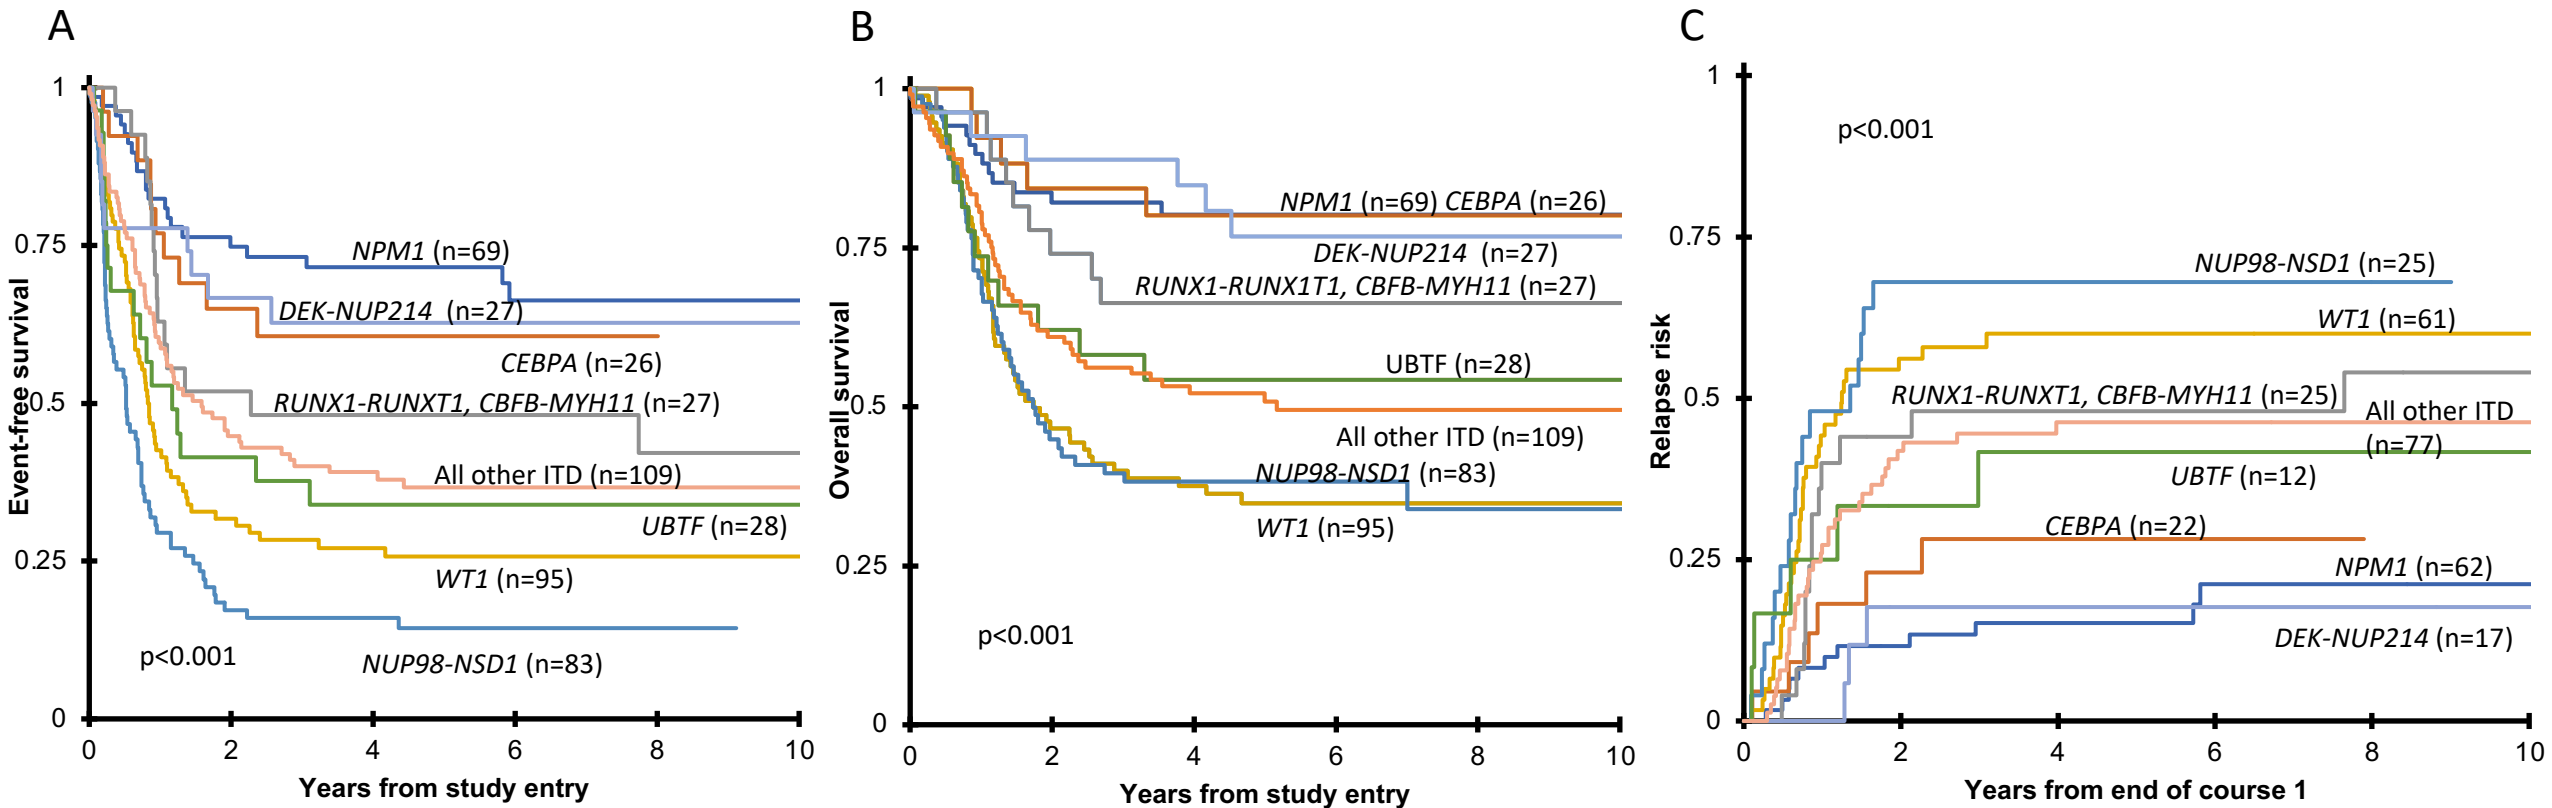

**Supplemental Figure S5. Outcomes for FLT3-ITD and non-FLT3-ITD patients according to co-occurring mutational risk groups, favorable (NPM1, CEBPA, RUNX1-RUNX1T1, CBFβ-MYH11), intermediate (non favorable or poor), and poor (WT1, UBTF, NUP98-NSD1). (A) 5-year event-free survival, (B) 5-year overall survival, (C) 5-year relapse risk.**

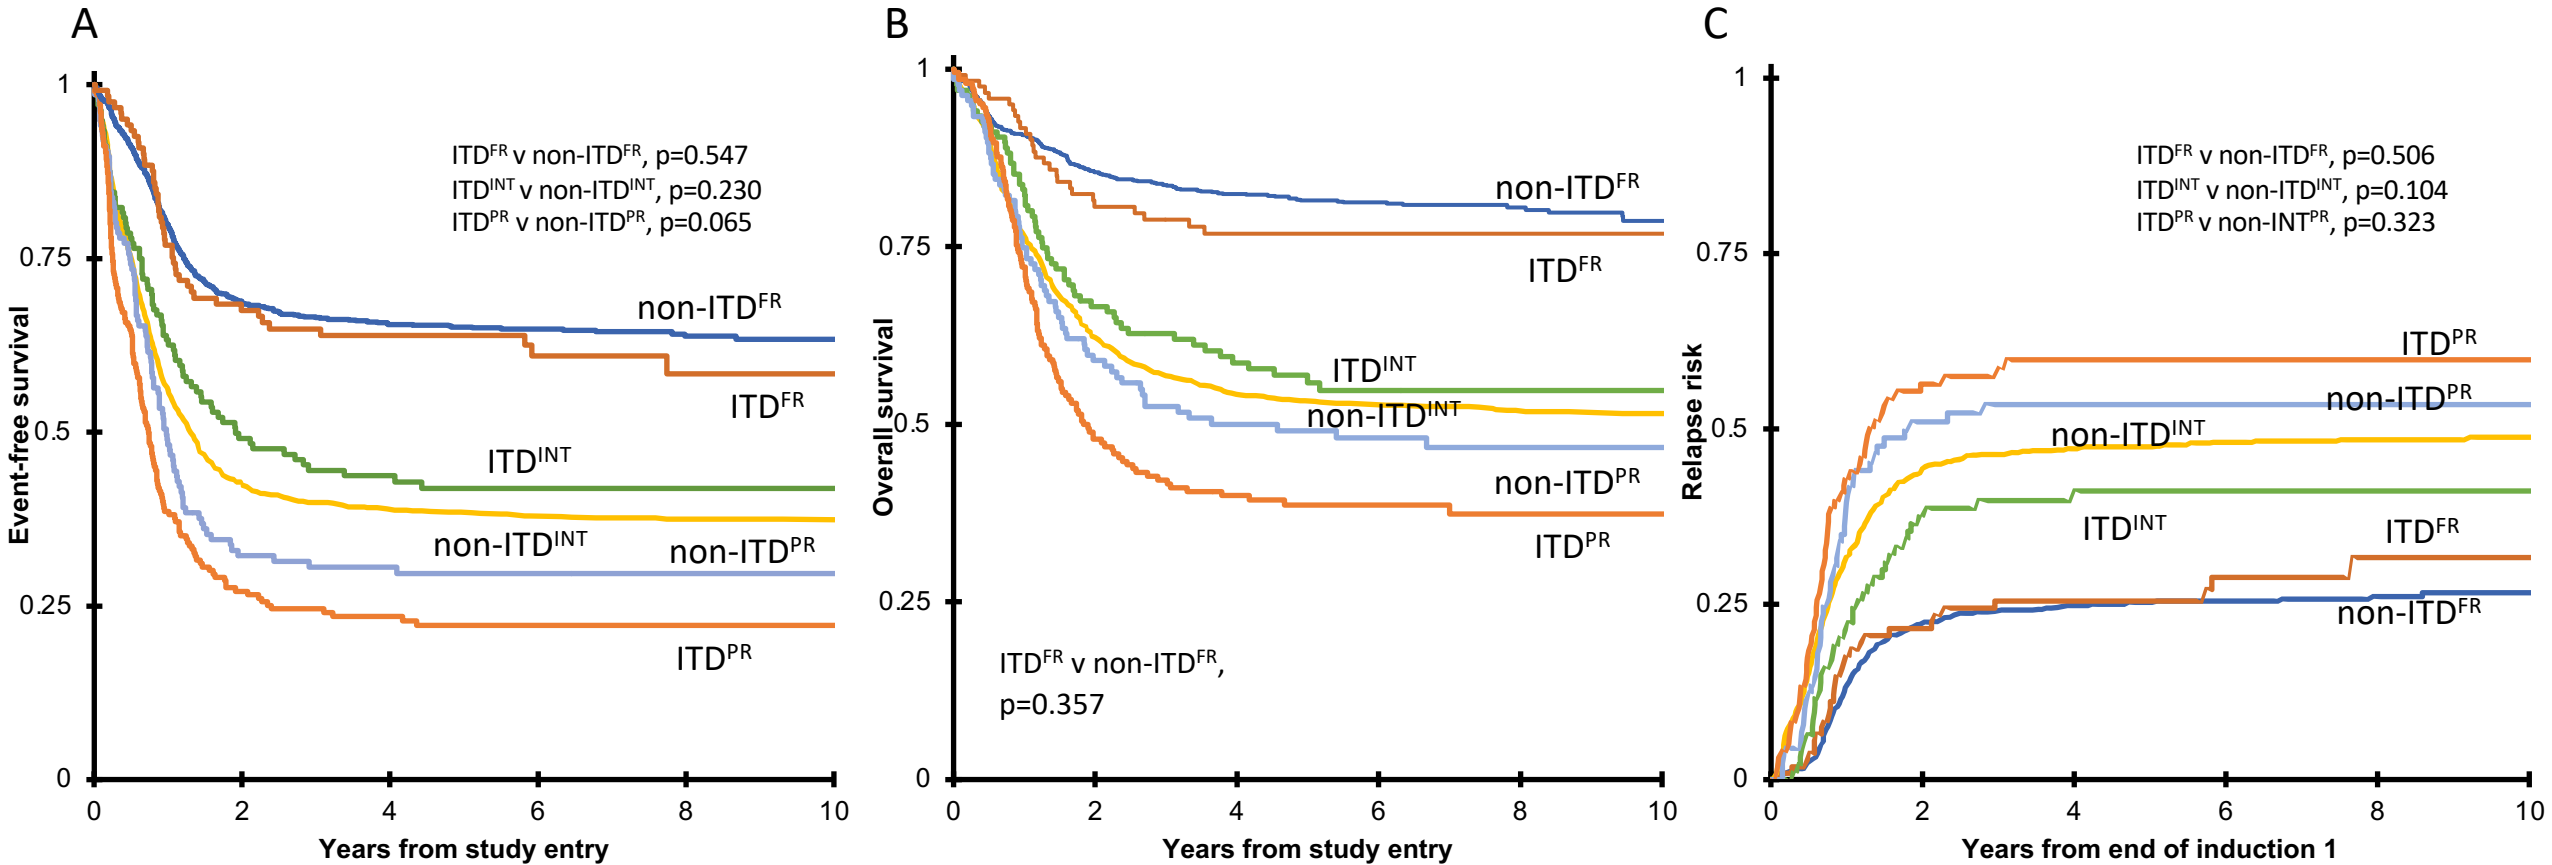

**Supplemental Figure S6. Outcomes for ITD<sup>pos</sup> patients treated Arm C of AAML1031 with sorafenib and HCT in CR1 according to co-occurring risk groups (FR, INT, and PR) and those with PR mutations further stratified according to presence of *NUP98::NSD1* fusion. (A) overall survival, (B) relapse risk.**

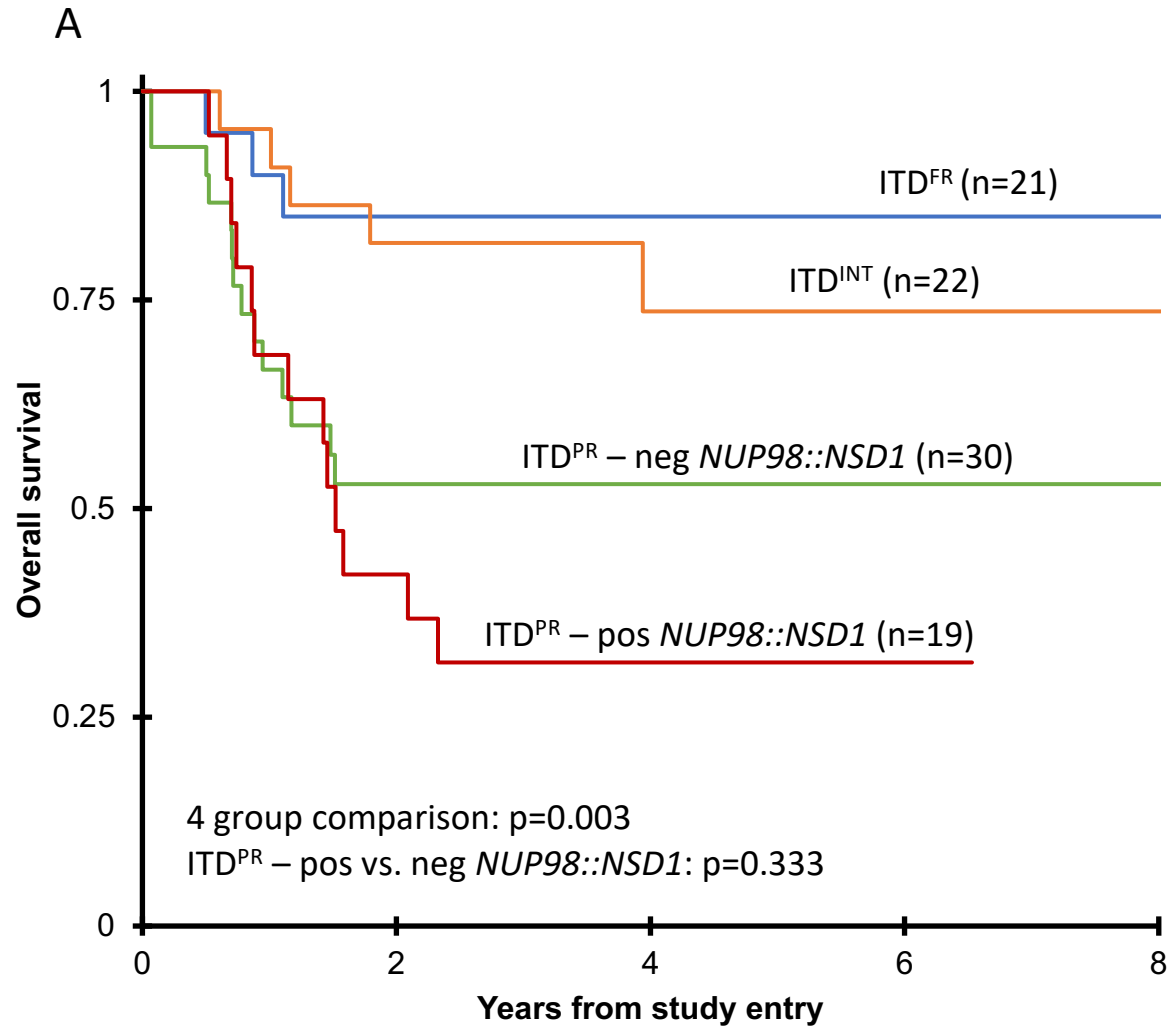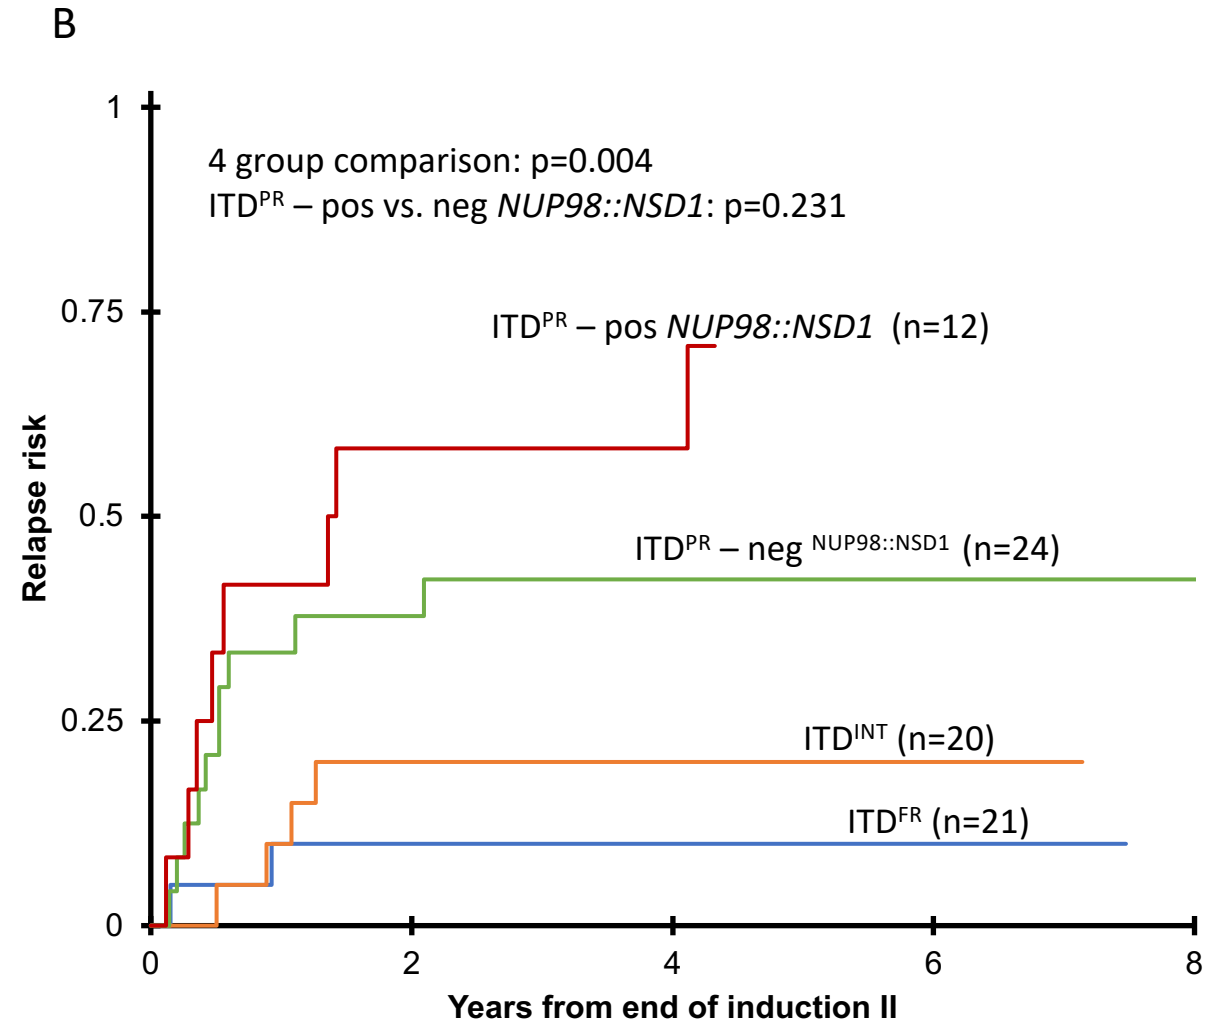

Supplement: BLOODA_ADV-2023-011980-mmc1.pdf [file BLOODA_ADV-2023-011980-mmc1.pdf]
