# Supplementary material for: Prognostic impact of cooccurring mutations in FLT3-ITD pediatric acute myeloid leukemia
Source: PubMed Central journal article supplement — Blood Adv. 2024 Feb 2;8(9):2094–103. doi: 10.1182/bloodadvances.2023011980 (PMC11063409; doi:10.1182/bloodadvances.2023011980), 2024-02-02
Supplement: BLOODA_ADV-2023-011980-mmc2.pdf [file BLOODA_ADV-2023-011980-mmc2.pdf]

| Characteristic                                         | Non-ITD<br>N=2,569<br>N (%) | ITD <sup>pos</sup><br>N=464<br>N (%) | P value       |
|--------------------------------------------------------|-----------------------------|--------------------------------------|---------------|
| Treatment Study                                        |                             |                                      |               |
| CCG-2961                                               | 536 (20.9%)                 | 74 (15.9%)                           | <b>.015</b>   |
| AAML03P1                                               | 240 (9.3%)                  | 30 (6.5%)                            | <b>.045</b>   |
| AAML0531                                               | 775 (30.2%)                 | 139 (32.1%)                          | .402          |
| AAML1031                                               | 1018 (39.6%)                | 211 (45.5%)                          | <b>.018</b>   |
| Age (years)                                            |                             |                                      |               |
| Median (range)                                         | 9.1 (0-29.8)                | 13.2 (0.6-29.5)                      | < <b>.001</b> |
| 0-1                                                    | 562 (21.9%)                 | 9 (1.9%)                             | < <b>.001</b> |
| 2-10                                                   | 898 (35.0%)                 | 157 (33.8%)                          | .641          |
| 11-15                                                  | 692 (26.9%)                 | 177 (38.1%)                          | < <b>.001</b> |
| 16-29                                                  | 417 (16.2%)                 | 121 (26.1%)                          | < <b>.001</b> |
| WBC x 10 <sup>3</sup> /μL at diagnosis, median (range) | 19.2 (0.5-918.5)            | 66.3 (0.2-860)                       | < <b>.001</b> |
| Peripheral Blasts %, median (range)                    | 32 (0-99)                   | 63.9 (0-100)                         | < <b>.001</b> |
| Bone Marrow Blasts %, median (range)                   | 65.3 (0-100)                | 80 (3-100)                           | < <b>.001</b> |
| Cytogenetic Features                                   |                             |                                      |               |
| Normal karyotype                                       | 423 (18.2%)                 | 225 (54.0%)                          | < <b>.001</b> |
| t(8;21)                                                | 381 (16.5%)                 | 14 (3.4%)                            | < <b>.001</b> |
| Inv(16)/t(16;16)                                       | 280 (12.0%)                 | 13 (3.1%)                            | < <b>.001</b> |
| 11q23 rearrangements                                   | 591 (25.4%)                 | 14 (3.4)                             | < <b>.001</b> |
| t(6;9)                                                 | 14 (0.6%)                   | 35 (7.5%)                            | < <b>.001</b> |
| Monosomy 7                                             | 48 (2.1%)                   | 1 (0.2%)                             | < <b>.001</b> |
| Monosomy 5/del 5q                                      | 32 (1.4%)                   | 1 (0.2%)                             | < <b>.001</b> |
| Trisomy 8                                              | 124 (5.3%)                  | 58 (12.5%)                           | < <b>.001</b> |
| Other                                                  | 437 (18.8%)                 | 62 (14.9%)                           | .058          |
| Unknown                                                | 329                         | 47                                   |               |
| End Induction 1 Response                               |                             |                                      |               |
| CR                                                     | 1961 (77.9%)                | 301 (66.9%)                          | < <b>.001</b> |
| Not in CR                                              | 557 (22.1%)                 | 149 (33.1%)                          |               |
| Unknown                                                | 51                          | 14                                   |               |
| MRD End Induction 1*                                   |                             |                                      |               |
| Negative                                               | 1318 (74.7%)                | 179 (53.6%)                          | < <b>.001</b> |
| Positive                                               | 447 (25.3%)                 | 155 (46.4%)                          |               |
| Unknown                                                | 804                         | 130                                  |               |
| MRD End Induction 2*                                   |                             |                                      |               |
| Positive                                               | 182 (12.4%)                 | 79 (32.9%)                           | < <b>.001</b> |
| Negative                                               | 1285 (87.6%)                | 161 (67.1%)                          |               |
| Unknown                                                | 1102                        | 224                                  |               |

**Supplemental Table S1. Clinical, cytogenetic and initial response to therapy characteristics of non-ITD and ITD<sup>pos</sup> patients.** Complete remission (CR), measurable residual disease (MRD), \* MRD not available for CCG-2961 patients
