# Supplementary material for: Prognostic impact of cooccurring mutations in FLT3-ITD pediatric acute myeloid leukemia
Source: PubMed Central journal article supplement — Blood Adv. 2024 Feb 2;8(9):2094–103. doi: 10.1182/bloodadvances.2023011980 (PMC11063409; doi:10.1182/bloodadvances.2023011980), 2024-02-02
Supplement: BLOODA_ADV-2023-011980-mmc3.pdf [file BLOODA_ADV-2023-011980-mmc3.pdf]

**Supplemental Figure S2. Outcomes of ITD<sup>POS</sup> vs non-ITD patients. (A) 5-year event-free survival, (B) overall survival, (C) relapse risk**

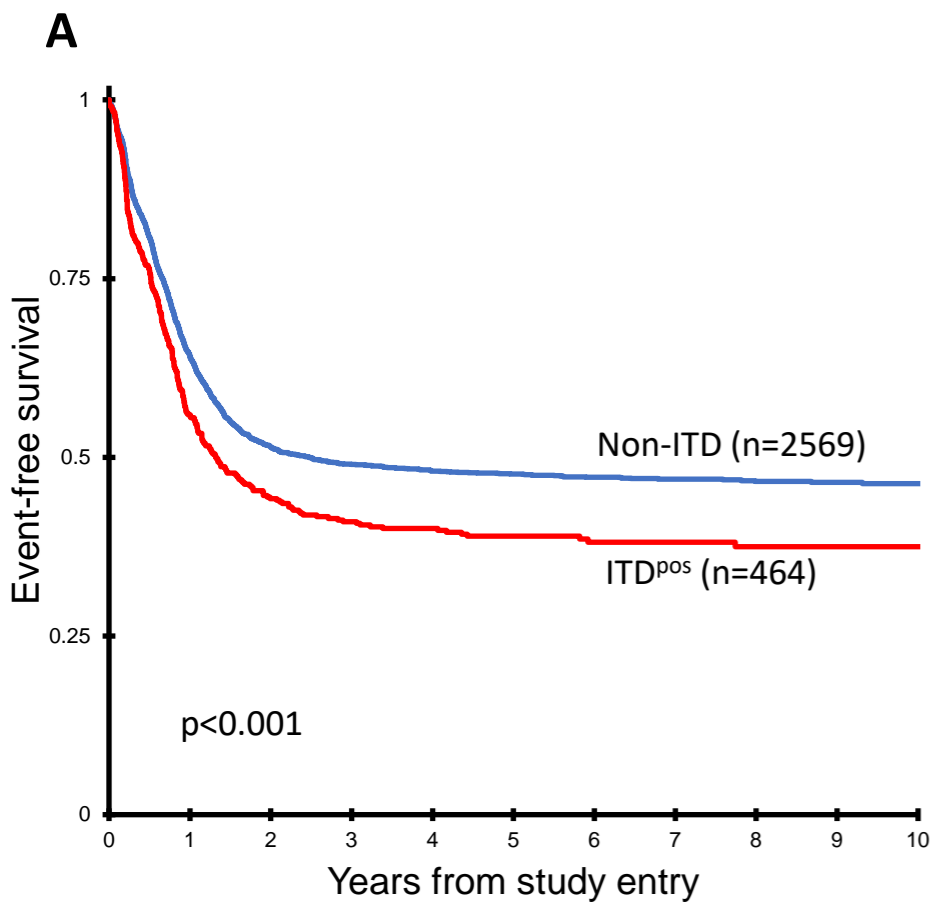

No. at risk

| Year             | 0    | 1    | 2    | 3    | 4    | 5   | 6   | 7   | 8   | 9   | 10  |
|------------------|------|------|------|------|------|-----|-----|-----|-----|-----|-----|
| Non-ITD          | 2569 | 1616 | 1263 | 1157 | 1088 | 960 | 768 | 591 | 426 | 297 | 226 |
| <i>FLT3</i> -ITD | 464  | 257  | 196  | 175  | 153  | 123 | 90  | 71  | 54  | 35  | 24  |

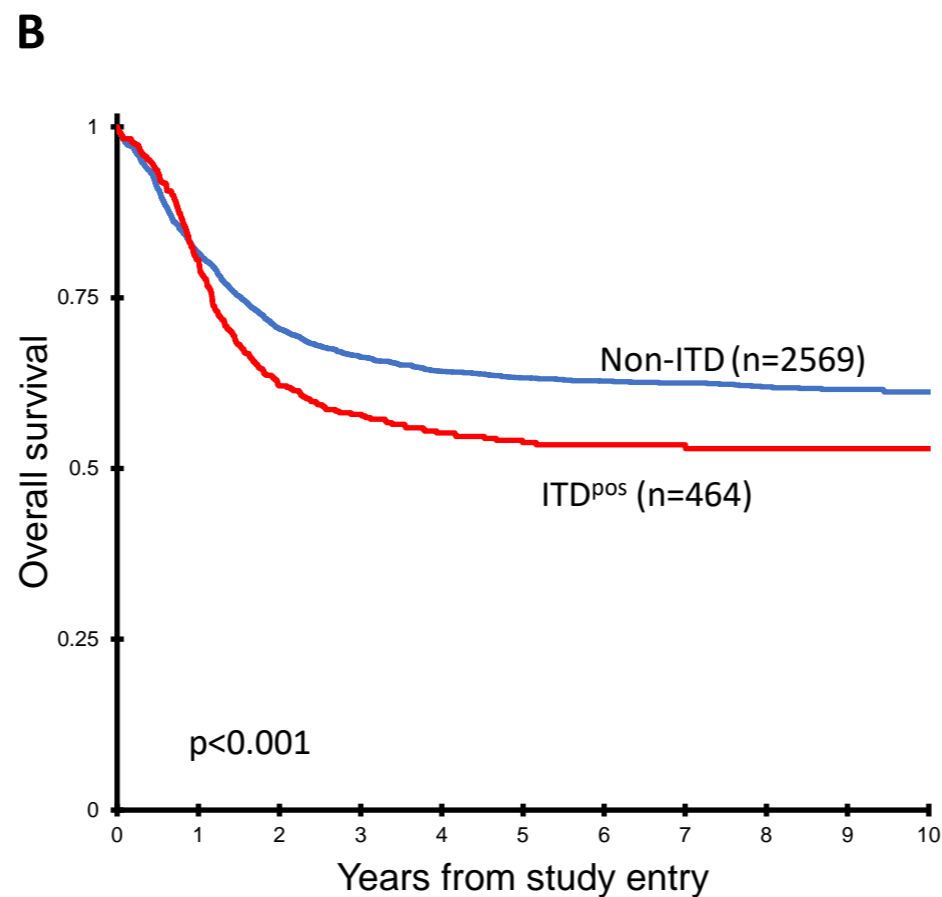

No. at risk

| Year             | 0    | 1    | 2    | 3    | 4    | 5    | 6    | 7   | 8   | 9   | 10  |
|------------------|------|------|------|------|------|------|------|-----|-----|-----|-----|
| Non-ITD          | 2569 | 2045 | 1720 | 1558 | 1455 | 1282 | 1025 | 790 | 566 | 383 | 288 |
| <i>FLT3</i> -ITD | 464  | 367  | 273  | 245  | 212  | 169  | 125  | 99  | 78  | 51  | 35  |

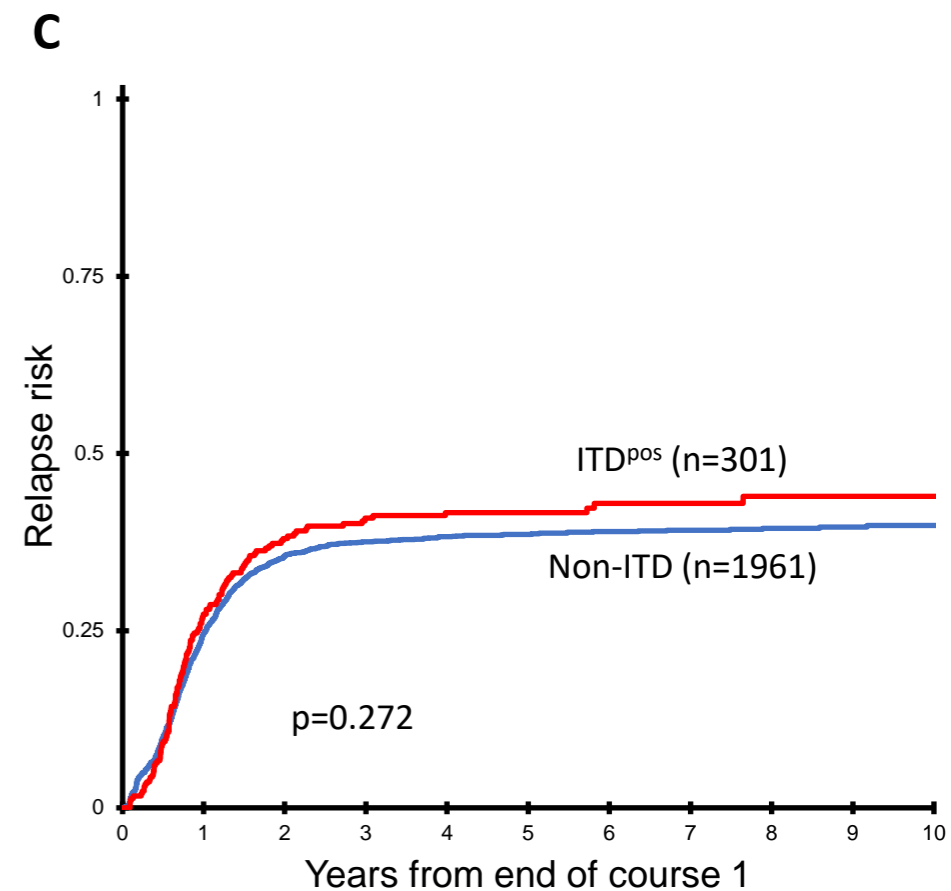

No. at risk

| Year             | 0    | 1    | 2    | 3   | 4   | 5   | 6   | 7   | 8   | 9   | 10  |
|------------------|------|------|------|-----|-----|-----|-----|-----|-----|-----|-----|
| Non-ITD          | 1961 | 1323 | 1074 | 992 | 932 | 814 | 648 | 498 | 346 | 238 | 176 |
| <i>FLT3</i> -ITD | 301  | 197  | 155  | 140 | 123 | 99  | 71  | 58  | 43  | 29  | 20  |
