# Supplementary material for: Prognostic impact of cooccurring mutations in FLT3-ITD pediatric acute myeloid leukemia
Source: PubMed Central journal article supplement — Blood Adv. 2024 Feb 2;8(9):2094–103. doi: 10.1182/bloodadvances.2023011980 (PMC11063409; doi:10.1182/bloodadvances.2023011980), 2024-02-02
Supplement: BLOODA_ADV-2023-011980-mmc4.pdf [file BLOODA_ADV-2023-011980-mmc4.pdf]

**Supplemental Figure S3. Event-free survival of ITD<sup>pos</sup> patients compared to non-ITD patients according to treatment trial. (A) CCG-2961, (B) AAML03P1, (C) AAML0531, (D) AAML1031.**

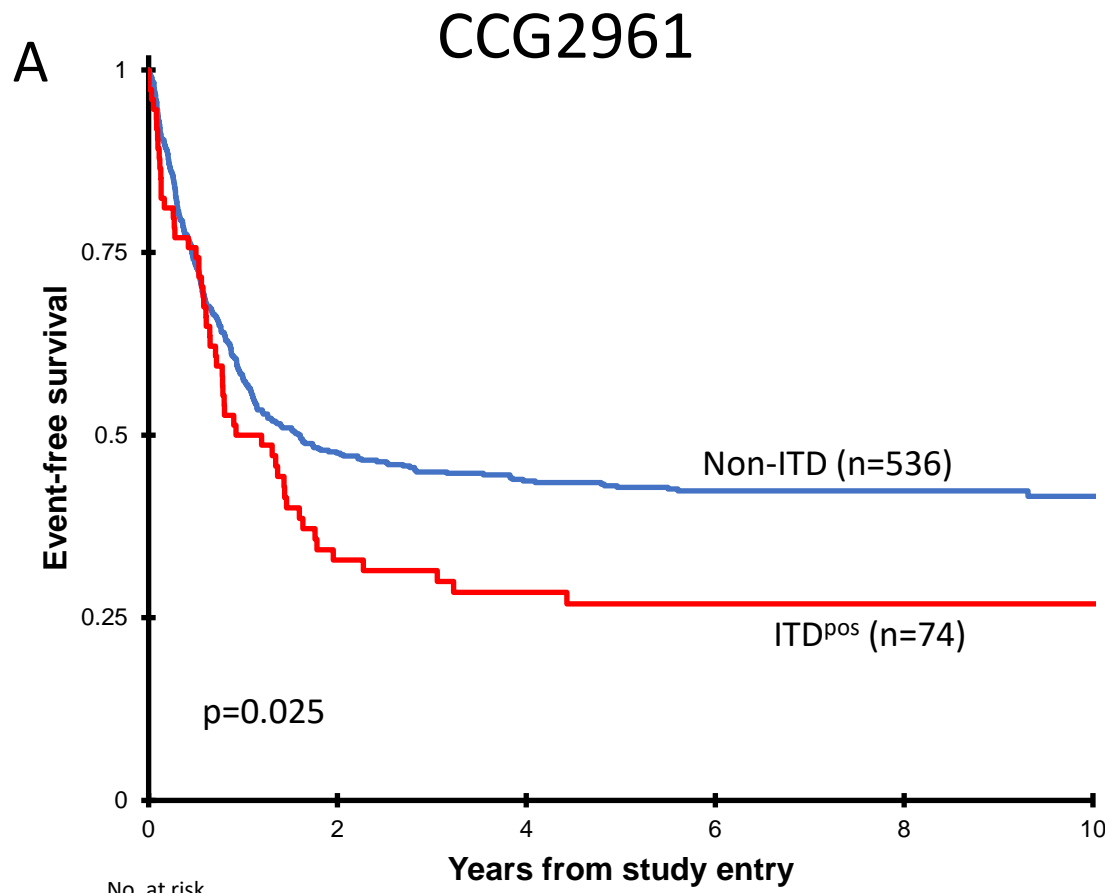

| No. at risk        |     |     |     |     |     |     |     |     |    |    |    |
|--------------------|-----|-----|-----|-----|-----|-----|-----|-----|----|----|----|
| Year               | 0   | 1   | 2   | 3   | 4   | 5   | 6   | 7   | 8  | 9  | 10 |
| Non-ITD            | 536 | 306 | 246 | 223 | 210 | 192 | 167 | 122 | 84 | 61 | 38 |
| ITD <sup>pos</sup> | 74  | 37  | 23  | 21  | 18  | 15  | 11  | 11  | 10 | 6  | 5  |

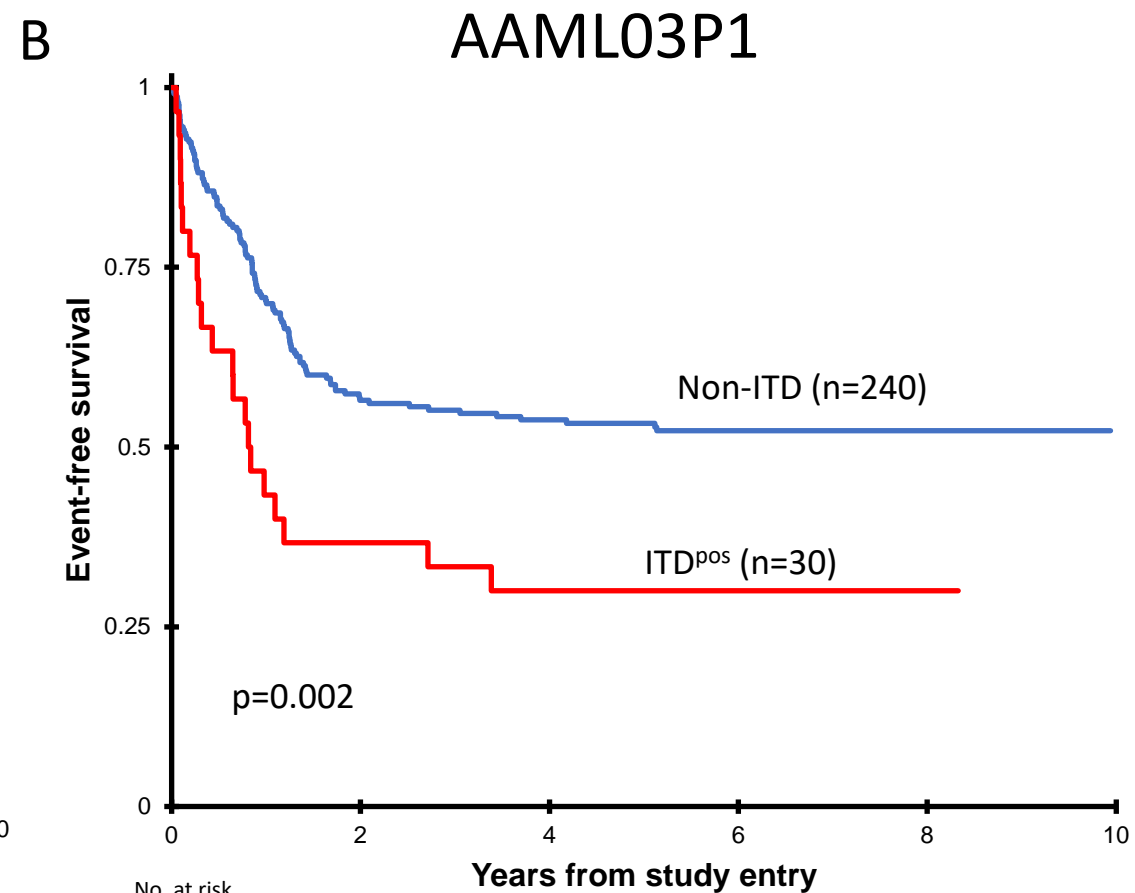

| No. at risk        |     |     |     |     |     |     |    |    |    |   |    |
|--------------------|-----|-----|-----|-----|-----|-----|----|----|----|---|----|
| Year               | 0   | 1   | 2   | 3   | 4   | 5   | 6  | 7  | 8  | 9 | 10 |
| Non-ITD            | 240 | 164 | 128 | 120 | 117 | 103 | 86 | 80 | 53 | 8 | 0  |
| ITD <sup>pos</sup> | 30  | 13  | 11  | 10  | 8   | 6   | 5  | 5  | 1  | 0 | 0  |

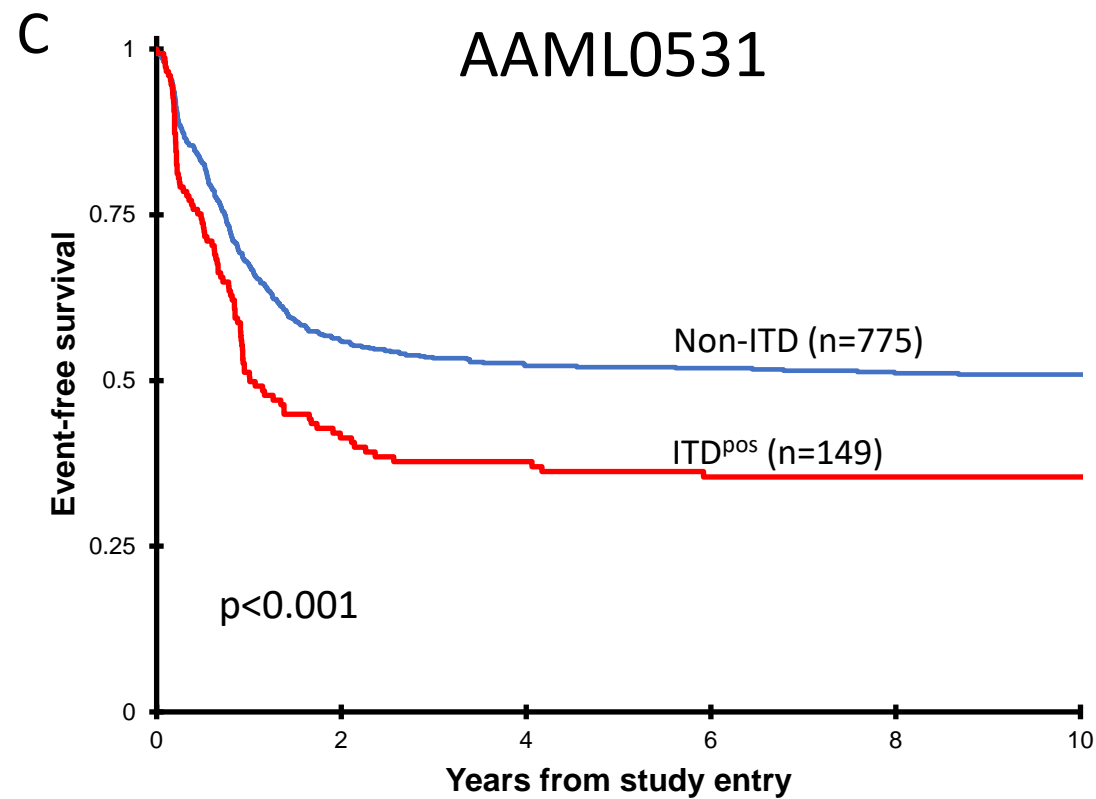

| No. at risk        |     |     |     |     |     |     |     |     |     |     |     |
|--------------------|-----|-----|-----|-----|-----|-----|-----|-----|-----|-----|-----|
| Year               | 0   | 1   | 2   | 3   | 4   | 5   | 6   | 7   | 8   | 9   | 10  |
| Non-ITD            | 775 | 510 | 419 | 382 | 351 | 332 | 303 | 271 | 249 | 224 | 188 |
| ITD <sup>pos</sup> | 149 | 75  | 58  | 52  | 50  | 48  | 45  | 39  | 35  | 29  | 19  |

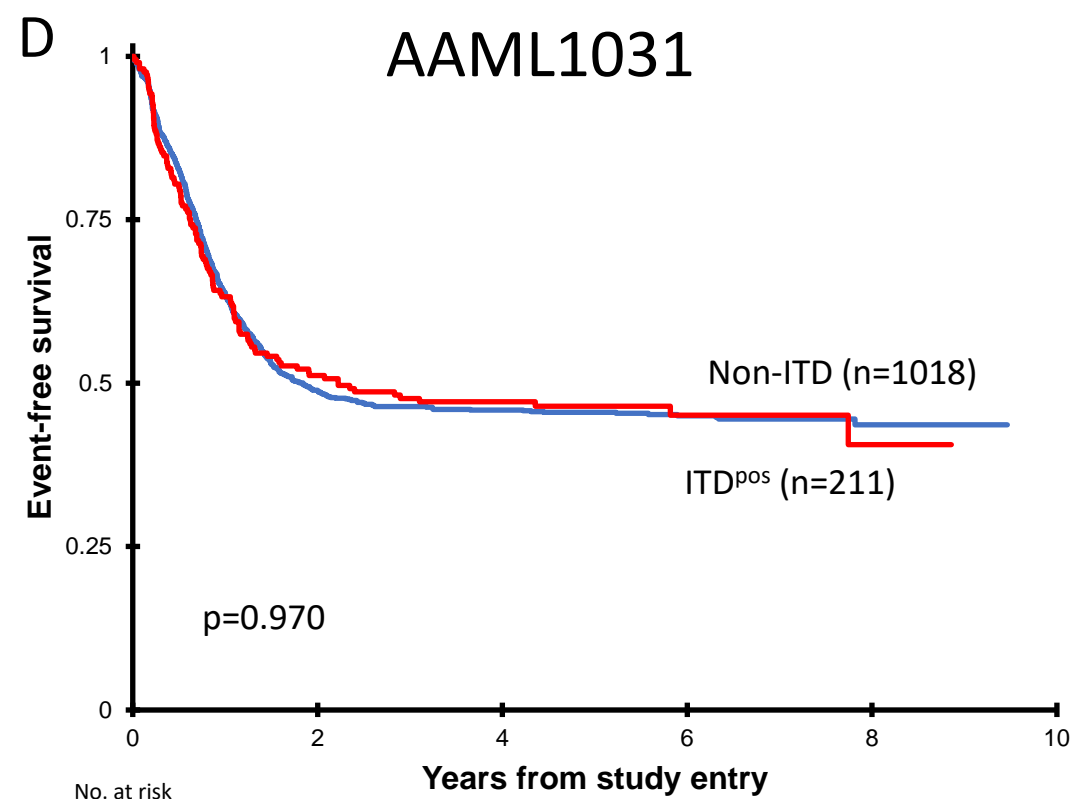

| No. at risk        |      |     |     |     |     |     |     |     |    |   |    |
|--------------------|------|-----|-----|-----|-----|-----|-----|-----|----|---|----|
| Year               | 0    | 1   | 2   | 3   | 4   | 5   | 6   | 7   | 8  | 9 | 10 |
| Non-ITD            | 1018 | 636 | 470 | 432 | 410 | 333 | 212 | 118 | 40 | 4 | 0  |
| ITD <sup>pos</sup> | 211  | 132 | 104 | 92  | 77  | 54  | 29  | 16  | 8  | 0 | 0  |
